**Title:** Updates to data versions and analytic methods influence the reproducibility of results from epigenome-wide association studies

**Authors:** Alexandre A. Lussier\*<sup>1,2,3</sup>, Yiwen Zhu<sup>1,4</sup>, Brooke J. Smith<sup>1</sup>, Andrew J. Simpkin<sup>5</sup>, Andrew D.A.C. Smith<sup>6</sup>, Matthew J. Suderman<sup>7</sup>, Esther Walton<sup>7,8</sup>, Kerry J. Ressler<sup>2,9</sup>, Erin C. Dunn\*\*<sup>1,2,3,10</sup>

**Affiliations:**

<sup>1</sup> Psychiatric and Neurodevelopmental Genetics Unit, Centre for Genomic Medicine, Massachusetts General Hospital, Boston, MA, 02114, USA.

<sup>2</sup> Department of Psychiatry, Harvard Medical School, Boston, MA, 02115, USA.

<sup>3</sup> Stanley Center for Psychiatric Research, The Broad Institute of Harvard and MIT, Cambridge, MA, 02142, USA.

<sup>4</sup> Department of Epidemiology, Harvard T.H. Chan School of Public Health, Boston, MA, 02114, USA

<sup>5</sup> School of Mathematics, Statistics and Applied Mathematics, National University of Ireland, Galway, Ireland.

<sup>6</sup> Mathematics and Statistics Research Group, University of the West of England, Bristol, UK.

<sup>7</sup> MRC Integrative Epidemiology Unit, Population Health Sciences, Bristol Medical School, University of Bristol, Bristol, UK.

<sup>8</sup> Department of Psychology, University of Bath, Bath, UK.

<sup>9</sup> McLean Hospital, Belmont, MA, 02478, USA.

<sup>10</sup> Center on the Developing Child at Harvard University, Cambridge, MA, 02138, USA.

**Corresponding authors:**

\*Alexandre A. Lussier: [alussier@mgh.harvard.edu](mailto:alussier@mgh.harvard.edu)

\*\*Erin C. Dunn: [edunn2@mgh.harvard.edu](mailto:edunn2@mgh.harvard.edu)

**Word count:** 4320

1 **ABSTRACT**

2 **Introduction:** Biomedical research has grown increasingly cooperative, with several large consortia  
3 compiling and sharing epigenomic data. Since data are typically preprocessed by consortia prior to  
4 distribution, the implementation of new pipelines can lead to different versions of the same dataset.  
5 Analytic frameworks also constantly evolve to incorporate cutting-edge methods and shifting best  
6 practices. However, it remains unknown how differences in data and analytic versions alter the results  
7 of epigenome-wide analyses, which has broad implications for the replicability of epigenetic  
8 associations. Thus, we assessed the impact of these changes using a subsample of the Avon  
9 Longitudinal Study of Parents and Children (ALSPAC) cohort.

10 **Methods:** We analyzed two versions of DNA methylation data, processed using separate preprocessing  
11 and analytic pipelines, to examine associations between childhood adversity and prenatal smoking  
12 exposure on DNA methylation at age 7. We performed two sets of analyses: (1) epigenome-wide  
13 association studies (EWAS); (2) Structured Life Course Modeling Approach (SLCMA), a two-stage  
14 method that models time-dependent effects. We also compared results from the SLCMA using more  
15 recent methodological recommendations.

16 **Results:** Differences between ALSPAC data versions impacted both EWAS and SLCMA analyses,  
17 yielding different sets of associations at conventional p-value thresholds. However, the magnitude and  
18 direction of associations was generally consistent between data versions, regardless of significance  
19 thresholds. Updating the SLCMA analytic version similarly altered top associations, but time-  
20 dependent effects remained concordant.

21 **Conclusions:** Changes to data and analytic versions influenced the results of epigenome-wide studies,  
22 particularly when using p-value thresholds as reference points for successful replication and stability.

23 **Keywords:** ALSPAC, epigenetic data versions, analytic versions, updates/revised, adversity, DNA  
24 methylation, reproducibility.

## 25 INTRODUCTION

26 Biomedical science has become increasingly cooperative over the past decade. The emergence of large  
27 datasets, combined with the small effects of biological measures on complex traits, has fueled such  
28 cooperation, making global collaboration with researchers more important now than ever. Access to  
29 large-scale data has emphasized the importance of identifying both replicable and stable findings, both  
30 across and within research studies. As such, large consortia, including birth cohorts, have become an  
31 integral part of these collaborative efforts, generating and compiling large amounts of research data  
32 ranging from behavioral and clinical markers to molecular and genetic measures. These data are often  
33 made available to collaborators and other researchers worldwide, facilitating the interrogation of  
34 broader research questions and enabling replication efforts.

35 Epigenetic data are one key data type collected within these consortia. Epigenetics refer to mechanisms  
36 that can result in heritable changes to gene expression without altering genetic sequences <sup>1</sup>. DNA  
37 methylation (DNAm) is the most common type of epigenetic mechanism measured in human studies.  
38 DNAm occurs when a methyl residue is added to cytosine residues, typically in the context of cytosine-  
39 guanine dinucleotides (CpG). DNAm is both stable over time and responsive to external signals in  
40 certain genomic contexts, which highlights its potential as a biomarker and mechanism for the  
41 biological embedding of environmental factors <sup>2</sup>. As such, epigenome-wide association studies  
42 (EWAS) have exploded in popularity, with over 1,600 papers on EWAS published since 2015.

43 To facilitate the sharing of DNAm data, datasets are often processed by the individual cohorts prior to  
44 distribution. However, due to both technological and conceptual developments over time, the data  
45 available from large cohorts will sometimes become outdated, requiring the distribution of revised  
46 versions to collaborators. In addition, individuals in longitudinal studies occasionally withdraw consent  
47 to share their data, reducing the overlap of samples between different data versions. At the same time,  
48 analytic frameworks are constantly updated and improved upon, resulting in newer cutting-edge

49 methods and shifting analytic best practices <sup>3</sup>. Yet, the extent to which differences in data versions and  
50 analytic pipelines lead to meaningful differences in analytic results remains unclear. This raises an  
51 important question as to the replicability and stability of findings across and within studies, which may  
52 influence our interpretation of epigenome-wide associations in biomedical research.

53 Here, we explored the impact of changes in data versions and analytic methods on the consistency of  
54 epigenome-wide findings (**Fig 1**). We analyzed two versions of epigenetic data collected from children  
55 at age 7 from the Avon Longitudinal Study of Parents and Children (ALSPAC) cohort, a longitudinal  
56 birth cohort near Bristol, England. We first characterized the difference between these versions with  
57 respect to the distributions of DNAm at the CpG- and individual-level to illuminate the discrepancies  
58 that can arise between data versions. Second, we performed two analyses to ascertain the impact of data  
59 version changes at the level of CpG-associations, using classical EWAS and a more nuanced analytic  
60 method called the Structured Life Course Modeling Approach (SLCMA) <sup>4</sup>. We performed these  
61 analyses using two different types of exposures, contrasting the results from psychosocial (childhood  
62 adversity) and physical (maternal smoking during pregnancy) exposures <sup>5,6</sup>. Finally, we compared  
63 results derived from SLCMA between two analytic versions, as more recent guidelines have emerged  
64 on its use in big data settings <sup>3</sup>. Overall, these analyses provide insight into the reproducibility of  
65 epigenome-wide associations and highlight the features of epigenetic data that are more reproducible  
66 and robust.

67

## 68 **MATERIALS AND METHODS**

### 69 **ALSPAC cohort**

70 ALSPAC is a large prospective cohort study that recruited 14,541 pregnancies in Avon, UK, with  
71 expected dates of delivery between 1 April 1991 and 31 December 1992 <sup>7,8</sup>. Further details of the study  
72 and available data are provided on the study website through a fully searchable data dictionary



73 (<http://www.bris.ac.uk/alspac/researchers/data-access/data-dictionary/>). Please note that the study  
74 website contains details of all the data that is available through a fully searchable data dictionary and  
75 variable search tool (<http://www.bristol.ac.uk/alspac/researchers/our-data/>). Ethical approval for the  
76 study was obtained from the ALSPAC Law and Ethics Committee and the Local Research Ethics  
77 Committees. Consent for biological samples has been collected in accordance with the Human Tissue  
78 Act (2004). Informed consent for the use of data collected via questionnaires and clinics was obtained  
79 from participants following the recommendations of the ALSPAC Ethics and Law Committee at the  
80 time. All data are available by request from the ALSPAC Executive Committee for researchers who  
81 meet the criteria for access to confidential data (<http://www.bristol.ac.uk/alspac/researchers/access/>).

82

### 83 **Epigenetic data generation**

84 DNAm profiles at birth, 7, and 15 years of age are part of the Accessible Resource for Integrated  
85 Epigenomic Studies (ARIES), a subsample of 1018 mother–child pairs from the ALSPAC cohort<sup>9</sup>. In  
86 this study, we focus on the samples collected at age 7. Briefly, DNA was extracted from peripheral  
87 blood samples according to established procedures. DNAm was then measured at 485,577 CpG sites  
88 across the genome using the Illumina Infinium Human Methylation 450K BeadChip microarray  
89 (Illumina, San Diego, CA). We received two versions of the DNAm data, which were processed using  
90 different pipelines by ALSPAC, as described below.

91

### 92 **Epigenetic data versions**

93 In the first version, which we refer to as the *old data* (2015 version), DNAm data were processed using  
94 the pipeline developed by Touleimat and Tost<sup>9,10</sup>. This pipeline involved performing background  
95 correction and quantile normalization using the R-package *wateRmelon*. DNAm values for all 485,577  
96 CpGs were provided in the old data version.

97 In the second data version, which we refer to as the *new data* (2018 version), DNAm data were  
98 processed using the pipeline developed by Min and colleagues <sup>11</sup>. In this version, background  
99 correction and functional normalization of DNAm data were performed using the R-package *meffil*. In  
100 addition, samples with > 10% of CpG sites with a detection p-value > 0.01 or a bead count < 3 in >  
101 10% of probes were removed. As such, there were fewer CpGs available for analysis (482,855) in the  
102 new data compared to the old data (**Fig 2A**). Furthermore, due to data processing and potential removal  
103 of consent for some individuals, only 948 participants overlapped between both data versions (**Fig 2A**).  
104 Only singleton birth participants present in both data versions were analyzed (n=946).  
105 For the current analyses, we further removed cross-hybridizing probes, polymorphic probes, and probes  
106 located in sex chromosomes, as well as those probes that did not overlap between both data versions.  
107 These filtering steps resulted in a list of 440,257 CpGs that were present in each data version. To  
108 remove possible outliers, we winsorized the beta values (i.e., values that represent % methylation) at  
109 each CpG site, setting the bottom 5% and top 5% of values to the 5th and 95th quantile, respectively.

## 110 **Measures of childhood adversity**

111 We investigated seven types of childhood adversity assessed between birth and age 7: experiences of  
112 sexual/physical abuse, caregiver physical/emotional abuse, maternal psychopathology, financial stress,  
113 family instability, one-adult households, and neighborhood disadvantage. These variables were coded  
114 the same way between both the old and new datasets. For a full description of these variables, please  
115 refer to Dunn and colleagues (2019), which described their coding in depth <sup>5</sup>.

## 116 **Analyses**

### 117 **Epigenome-wide association study (EWAS) of childhood adversity**

118 To determine how data versions can influence the results of traditional epigenome-wide methods, we  
119 performed EWAS for each of the childhood adversities described above using the old and new data  
120 versions. Here, we categorized children as ‘exposed’ or ‘unexposed’ to adversity on whether they

121 experienced a given adversity between ages 0 to 7. We performed these epigenome-wide associations  
122 using the *limma* package in R<sup>12</sup>. Consistent with previous work on these exposures<sup>5</sup>, we included the  
123 following covariates to account for potential confounding: sex, race/ethnicity, maternal age at birth,  
124 maternal education, birth weight, number of previous pregnancies, maternal smoking during  
125 pregnancy, and cell type proportions estimated using the Houseman method<sup>13</sup>. We accounted for  
126 multiple-testing using the Benjamini-Hochberg method and set the false discovery rate (FDR) at 5%<sup>14</sup>.

127

### 128 **Structured Life Course Modeling Approach (SLCMA) of childhood adversity**

129 The SLCMA is a two-stage method that compares different life course hypotheses that describe the  
130 relationship between time-dependent exposures and an outcome of interest<sup>4,15,16</sup>. This method  
131 simultaneously compares a set of *a priori*-specified life course hypotheses encoding time-varying  
132 exposure-DNA<sub>m</sub> relationships, such as the timing of exposure (sensitive periods), or a cumulative  
133 count of exposures over time (accumulation of risk). Therefore, it provides more nuanced insights  
134 about exposure mechanisms beyond the traditional analyses of exposed versus unexposed individuals.  
135 Importantly, the SLCMA has been applied in multiple contexts to determine whether the timing of  
136 certain exposures can influence outcomes, including psychometric measures and DNA<sub>m</sub><sup>3,17</sup>. To  
137 summarize SLCMA briefly, in the first stage, variable selection (LARS-LASSO) is used to select the  
138 life course hypothesis that explains the greatest proportion of outcome variation. In the second stage,  
139 post-selection inference is performed to obtain point estimates, confidence intervals, and p-values for  
140 the hypothesis selected from the first stage, accounting for multiple testing burden associated with  
141 testing several life course hypotheses simultaneously for each locus.

142 To assess the impact of data version changes on SLCMA results, we tested the association between  
143 childhood adversity and epigenetic patterns, as previously reported by Dunn and colleagues (2019), in  
144 both data versions. adjusted for the same covariates as the EWAS analyses above. We tested five

145 different life course hypotheses, including three sensitive periods hypotheses encoding exposures  
146 during the following three time periods: 1) very early childhood (0-2), 2) early childhood (3-5), 3)  
147 middle childhood (6-7); and two additive hypotheses: 4) total number exposures across childhood  
148 (accumulation), and 5) number of exposures weighted by time (recency). Post-selection inference was  
149 performed using the covariance test (*covTest*) method<sup>18</sup>. We accounted for multiple-testing at the  
150 epigenome-level using the Benjamini-Hochberg method and set the FDR at 5%<sup>14</sup>.

151

### 152 **Analytic version updates of the SLCMA of childhood adversity**

153 To determine how updates to analytic versions influence the SLCMA results, we compared the results  
154 from the new data using the analysis described above, which we refer to as the *standard analysis*, to the  
155 latest recommendations for the SLCMA as described by Zhu and colleagues (2020), which we refer to  
156 as the *updated analysis*. This approach differed in three major ways. First, post-selection inference was  
157 performed using the selective inference method, which reduces p-value inflation compared to the  
158 covariance test in high dimensional analyses<sup>3,19</sup>. Second, we adjusted for covariates using the Frisch-  
159 Waugh-Lovell (FWL) theorem (partitioned regression)<sup>20</sup>. This method has been used in penalized  
160 regression analyses and can improve the statistical power to detect differences between groups<sup>3,21</sup>.  
161 Third, we updated the covariates to reflect best practices in the ALSPAC cohort, swapping parental  
162 occupation-based social class for maternal education. Maternal education is not only a better predictor  
163 of health and DNA methylation patterns, but also has better availability and comparability in other birth  
164 cohorts, allowing for more direct comparisons and integration into future meta-analyses<sup>22,23</sup>.

165

### 166 **Sensitivity analyses of prenatal exposure to maternal smoking.**

167 Given that the associations between smoking and DNA methylation are some of the best replicated  
168 findings in the EWAS field, we performed additional sensitivity analyses to contrast this physical  
169 exposure to the psychosocial exposures described above. We assessed the impact of data versions on

170 the association between exposure to maternal smoking during pregnancy and epigenetic patterns, as  
171 previously reported by Richmond and colleagues (2018). Following the same approach as the analyses  
172 of childhood adversity, we performed an EWAS of prenatal exposure to maternal smoking in the old  
173 and new data versions. Maternal smoking exposure was ascertained repeatedly in all three trimesters,  
174 wherein smoking at any point was considered prenatal smoking exposure <sup>6</sup>. For the SLCMA analysis,  
175 we tested five separate life course hypotheses of prenatal smoking exposure: first trimester, second  
176 trimester, third trimester, accumulation across all trimesters, and recency of exposure.

177

## 178 **RESULTS**

### 179 **Old and new versions of the ALSPAC data differed by several key descriptive features**

180 We first assessed the CpG- and individual-level differences between the ALSPAC data normalized  
181 using the Tost pipeline (*old*) and the meffil pipeline (*new*). The genome-wide distribution of DNAm  
182 values from the old data were generally shifted towards the center in the new data (**Fig 2B and 2C**).  
183 CpG-level variability, assessed by the standard deviation of each CpG, was generally higher in the old  
184 data (**Fig 2D**). In addition, we detected higher individual-level variability (across all CpGs) in the new  
185 data than in the old data, which showed no individual-level variability due to the use of quantile  
186 normalization (**Fig 2E**). Nevertheless, individual-level data were generally highly correlated between  
187 data versions (mean  $r=0.981$ ,  $SD=0.003$ ), with no clear biases being detected in specific chromosomes  
188 (**Fig 2F**). However, CpGs located in 3'UTRs showed slightly lower correlations between versions (**Fig**  
189 **2G**). Estimated cell-type proportions showed only slight differences between data versions but were  
190 mostly similar (**Fig 2H**).

191

### 192 **Epigenome-wide association study results differed between data versions**

193 To determine how data versions may impact the results from traditional EWAS, we analyzed the  
194 association between each of the seven childhood adversity exposures and DNA methylation at age 7 in

195 both ALSPAC DNAm data versions. Overall, we found little concordance between data versions for  
196 psychosocial exposures. In the old data, we identified one CpG at an FDR <0.05 for the abuse  
197 exposure, but no significant associations for the other adversities. By contrast, using the new data, we  
198 identified five CpGs at an FDR <0.05, but those were associated with exposure to financial stress.  
199 Moreover, no significant CpGs overlapped between the old and new data versions (**Fig 3A**). Indeed,  
200 beyond significance thresholds, the overlap of CpGs by p-value rank was somewhat low for most  
201 adversities (10-40%) but remained higher than by random chance (**Fig 3B**).

202 However, for each set of top CpGs (ranked by p-values), those that overlapped between data versions  
203 showed relatively good rank correlation, suggesting that some signal may be retained between data  
204 versions (**Fig 3C**). Importantly, top CpGs also showed high concordance in the direction and  
205 magnitude of differences in DNAm between exposed and unexposed groups (**Fig 3D**). As such, it  
206 appeared that the differences introduced by changing data versions caused fluctuations in the results at  
207 the level of p-value thresholds, but the results from the EWAS of childhood adversity were more  
208 similar when considering p-value ranks, as well as the direction and magnitude of associations.

209

### 210 **Data versions also changed the results from the SLCMA**

211 To determine how data versions can influence more sensitive or complex methods beyond an EWAS,  
212 we assessed the impact of data versions on the SLCMA results. Here, we identified 372 CpGs in the  
213 old data and 664 CpGs in the new data at an FDR<0.05 across all seven adversities, with 52 CpGs  
214 overlapping between data versions (**Table 1; Fig 3E; Tables S1, S2**). The most selected hypotheses for  
215 significant CpGs were different between data versions (**Fig 3F**), as were the adversities with the most  
216 hits (**Table 1**). The old data showed more associations with *very early childhood* and neighborhood  
217 disadvantage, whereas the new data showed more associations with *early childhood* and financial  
218 stress. However, significant CpGs generally had the same hypothesis selected across data versions,

219 with little changes in the CpGs significant in the analyses of both versions (**Fig 3G**). In addition, top  
220 hits generally showed the same direction of change and similar magnitude between data versions (**Fig**  
221 **3H**). These results highlight the brittleness of p-value thresholds, which result in few overlaps between  
222 data versions, despite the general characteristics of these CpGs and their associations being similar  
223 between data versions.

224

### 225 **Analytic versions altered the results from the SLCMA of childhood adversity**

226 Finally, we assessed the impact of updates to analytic versions on the results from SLCMA, as per the  
227 recommendations of Zhu and colleagues (2020) using only the new data version. We first performed  
228 the SLCMA analysis of the childhood adversities with the standard covariates and adjustment strategy  
229 but using the selective inference method in the second stage, rather than the covariance test. However,  
230 only one CpG was significant at an  $FDR < 0.05$  in this analysis. As such, we performed a comparison  
231 between the standard analytic version and the fully updated pipeline, which uses FWL correction and  
232 updated covariates. We identified 48 CpGs at an  $FDR < 0.05$  in this updated analysis, with 44  
233 overlapping with results from the original pipeline in the new dataset (**Fig 4A; Table S3**). The majority  
234 of significant CpGs in this new analysis were association with early childhood exposure to family  
235 instability, a pattern that differed slightly from the standard version of the analysis in the new data  
236 (**Table 1; Fig 4B**). All significant CpGs between analytic versions showed the same hypothesis  
237 selected (**Fig 4C**). These results suggested that the reduction in power of the selective inference method  
238 can potentially be offset by the use of the FWL theorem and that updates to covariates only cause  
239 minor changes to the results. We also note that 4 CpGs overlapped between all analyses (old data with  
240 standard analysis; new data with standard analysis; new data with updated analysis), representing the  
241 associations that survived technical replication across both data and analytic versions (**Table S4**).

242

243 **Sensitivity analyses of prenatal smoke exposure showed similar results to psychosocial exposures**

244 To determine whether the impact of data and analytic version changes were limited to psychosocial  
245 exposures, we performed secondary analyses of prenatal smoking exposure (**supplemental materials**).  
246 While the EWAS of smoking showed more overlap and consistency between data versions than  
247 psychosocial exposures (**Fig S1**), we again observed differences in terms overall concordance at the  
248 level of p-values and magnitude of change. These results suggested that p-value thresholds remain  
249 relatively arbitrary, even with “gold-standard” epigenetic associations. Our secondary analysis of  
250 prenatal smoking exposure using the SLCMA also found some overlapping CpGs at an  $FDR < 0.05$  and  
251 major changes to selected hypotheses between data versions (**Fig S2**). These results further suggest that  
252 SLCMA was more sensitive to fluctuations between data versions than EWAS, particularly during the  
253 second step of the approach when significance was assessed. We also found few overlaps between the  
254 standard and updated analytic versions of the SLCMA of prenatal smoking, suggesting that updates to  
255 covariates may have different effects on the results from SLCMA depending on analysis-specific  
256 confounding structures, since these effects were not observed with the childhood adversity analyses  
257 (**Fig S2**).

258

259 **DISCUSSION**

260 A major challenge in conducting epigenetic analyses centers around the replicability of findings across  
261 cohorts, particularly when standard practices are constantly evolving. In this study, we quantified these  
262 differences, showing that even within the same dataset, updates to preprocessing pipelines and analytic  
263 frameworks altered the DNA methylation loci that were associated with psychosocial and physical  
264 exposures at standard p-value significance thresholds, while the magnitude of differences at these loci  
265 tended to remain the same.



266 The major differences between the data versions arose from two main sources: 1) individuals added or  
267 removed from the analyses due to preprocessing and withdrawal of consent for certain individuals, and  
268 2) changes to the preprocessing pipeline for DNAm data. Although we accounted for this first factor by  
269 only analyzing overlapping samples, we found broad differences in both CpG-level and individual-  
270 level DNAm patterns that must therefore be caused by preprocessing differences. One particularly  
271 striking difference was observed at the individual level, wherein the new dataset showed increased  
272 variability across individuals due to the use of functional normalization, rather than quantile  
273 normalization in the old dataset. Such normalization techniques provide a major technical and  
274 conceptual difference in the preprocessing of DNAm data, as quantile normalization assumes that all  
275 individual samples have identical distributions of DNAm across the genome<sup>24</sup>. Bulk differences  
276 between data versions were also apparent at the level of estimated cell-type proportions. Given that cell  
277 types are estimated from the DNAm data, they may reflect broader differences between data versions,  
278 which may, in turn, broadly influence the results of epigenetic analyses. Overall, no single facet of the  
279 data fully reflected the changes between datasets, suggesting that a combination of sample differences  
280 and normalization techniques likely leads to different results between versions.

281 As such, it is perhaps unsurprising that updates to data versions resulted in broad changes to the results  
282 of both our EWAS and SCLMA of psychosocial exposures. Although these exposures may have  
283 subtler effects on the epigenome, we found little reproducibility at the level of p-value thresholds and  
284 ranking. By contrast, the magnitude of change between exposed and unexposed individuals was highly  
285 reproducible across all CpGs in both types of analyses. For the SLCMA, we also found that hypothesis  
286 selection was stable across data versions (i.e., the first stage of SLCMA), but p-values obtained from  
287 post-selection inference were different (i.e., the second stage of SLCMA), further highlighting the  
288 fragility of inference based on p-values across our analyses. Numerous recent reports have already  
289 urged the scientific community to move away from p-values as a measure of significance and

290 reproducibility since p-values can be less than informative and sometimes misleading<sup>25-28</sup>. In  
291 particular, the American Statistical Association recently outlined six important principles to avoid the  
292 misuse of p-values in scientific analyses<sup>29</sup>. They note that p-values are not a good measure of evidence  
293 on their own, nor do they measure the size or importance of an effect. Our results show these  
294 statements hold true in epigenome-wide analyses. Building from our findings and prior  
295 recommendations, we urge researchers to supplement standard analyses (e.g., reporting of p-values)  
296 with metrics that provide additional insight into the reproducibility and strength of associations, such as  
297 their magnitude and direction of effect, and allow for better understanding of both mean and variance  
298 differences within a sample<sup>30</sup>.

299 When we updated the SLCMA analytic version, we observed a not only a loss of p-value significance  
300 for several CpGs, but also several new associations. Given that we changed three main factors between  
301 analytic versions, there are at least three possible causes for these observed differences. First, selective  
302 inference is more stringent than the covariance test, which can produce inappropriately small p-values  
303<sup>3</sup>. This initial difference resulted in a total loss of FDR-significant CpGs, without any changes to the  
304 magnitude of associations, thus explaining the reduction in the number of significant CpGs. Second,  
305 the application of the FWL theorem alongside selective inference resulted in more FDR-significant  
306 CpGs. However, since the FWL theorem improves statistical power without influencing the effect  
307 estimates of associations<sup>3</sup>, no new associations should arise from its application in the updated analytic  
308 version, which would explain the overlapping FDR-significant CpGs between the standard and updated  
309 analytic versions. Thus, the third difference – updates to covariates in the statistical model – is likely  
310 responsible for the emergence of four new FDR-significant CpGs in the SLCMA of psychosocial  
311 exposures. Although these differences were minor, they reflect the potential effect of moving towards  
312 more appropriate covariates in epigenome-wide analyses, such as the use of maternal education rather  
313 than occupation-based social class in the ALSPAC cohort. This result is contrasted in the secondary

314 analyses of prenatal smoking, where changes to covariates greatly influenced the results of the  
315 analyses, highlighting that careful consideration of potential confounding is required for different types  
316 of analyses.

317 In contrast to the analyses of psychosocial exposures, the EWAS of prenatal smoking, a physical  
318 exposure, was relatively reproducible when using p-value thresholds. This finding was expected  
319 considering that cigarette smoke has the most reproduced findings from epigenome-wide studies <sup>31,32</sup>.  
320 However, the overall ranking and overlap of CpGs beyond FDR-significance remained relatively low  
321 in the EWAS, resulting in similar levels as psychosocial exposures across the top 5,000 CpGs. These  
322 results could potentially highlight the mechanisms by which such exposures become biologically  
323 embedded. Whereas smoking exposure has not just well defined, but also targeted cellular processes  
324 (i.e., implicated pathways that clear toxins from the organism), psychosocial exposures may have more  
325 systemic influences, impacting a broader set of CpGs with smaller effects <sup>33,34</sup>. In addition, it is  
326 possible that psychosocial exposures may have greater influences in central nervous system, rather  
327 than peripheral tissues, resulting in more moderate signals from blood samples <sup>35</sup>. Of note, SLCMA  
328 analyses of smoking were not well reproduced across data and analytic versions. Although these results  
329 may be due to a variety of factors, a potential explanation is that smoking may not be a time-dependent  
330 exposure. Life course modeling approaches lose power when hypotheses are highly correlated,  
331 reducing their ability to make statistical inferences <sup>16</sup>. As such, these broad differences between  
332 versions may indicate that the SCLMA is not appropriate for an exposure such as prenatal smoking,  
333 which may influence epigenetic patterns equally throughout development.

334

335 The inevitable fluctuations in epigenome-wide associations highlight the importance of tracking data  
336 and analytic versions across epigenetic analyses to improve both the reproducibility and replicability of  
337 findings. As a field, we should endeavor to use the most up-to-date data versions and analytic models

338 before performing analyses. This approach is particularly relevant for subtler exposures, such as  
339 childhood adversity, where the epigenetic signal may require more nuanced methods due to limited  
340 sample sizes. Our investigation has shown the benefit of comparing data and analytic versions in a  
341 stepwise manner (i.e. that the observed differences in results can be explained step by step). Moving  
342 beyond p-values as a single metric for significance appears to be a necessary first step towards  
343 replicability, but p-values remain an important feature of biomedical research<sup>28</sup>. We propose that  
344 researchers consistently report the magnitude and direction of effects alongside p-values to provide  
345 insight into their findings. Furthermore, as CpGs tend to be highly correlated, nuanced approaches that  
346 go beyond statistical and effect size cutoffs can be used to gain broader insight into the biological  
347 mechanisms influenced by a given exposure or disease. Such methods include those assessing  
348 differentially methylated or co-methylated regions<sup>36,37</sup>, or genome-wide effects, such as WGCNA and  
349 other network analyses<sup>38</sup>.

350

## 351 **CONCLUSIONS**

352 Changes to both data and analytic versions do impact results derived from epigenome-wide studies  
353 using both traditional and more nuanced methods. As differences not only depend on the robustness of  
354 associations, but also nuances and complexities of the analyses, our results highlight the challenges in  
355 making direct comparisons between and within datasets, stressing the importance of transparency in  
356 reporting these differences.

357

## 358 **ACKNOWLEDGMENTS**

359 This work was supported by the National Institute of Mental Health of the National Institutes of Health  
360 (grant number R01MH113930 awarded to ECD). The content is solely the responsibility of the authors  
361 and does not necessarily represent the official views of the National Institutes of Health. Dr. Dunn and  
362 Dr. Lussier were also supported by a grant from One Mind. We are extremely grateful to all the

363 families who took part in the ALSPAC study, the midwives for their help in recruiting them, and the  
364 whole ALSPAC team, which includes interviewers, computer and laboratory technicians, clerical  
365 workers, research scientists, volunteers, managers, receptionists and nurses. The UK Medical Research  
366 Council and Wellcome (Grant ref: 217065/Z/19/Z) and the University of Bristol provide core support  
367 for ALSPAC. A comprehensive list of grants funding is available on the ALSPAC website  
368 (<http://www.bristol.ac.uk/alspac/external/documents/grant-acknowledgements.pdf>); This research was  
369 specifically funded by grants from the BBSRC (BBI025751/1; BB/I025263/1), IEU  
370 (MC\_UU\_12013/1; MC\_UU\_12013/2; MC\_UU\_12013/8), National Institute of Child and Human  
371 Development (R01HD068437), NIH (5R01AI121226-02), and CONTAMED EU (212502). This  
372 publication is the work of the authors, whom will serve as guarantors for the contents of this paper.  
373 Dr. Walton is funded by CLOSER, whose mission is to maximise the use, value and impact of  
374 longitudinal studies. CLOSER was funded by the Economic and Social Research Council (ESRC) and  
375 the Medical Research Council (MRC) between 2012 and 2017. Its initial five-year grant has since been  
376 extended to March 2021 by the ESRC (grant reference: ES/K000357/1). The funders took no role in the  
377 design, execution, analysis or interpretation of the data or in the writing up of the findings.  
378 [www.closer.ac.uk](http://www.closer.ac.uk). Dr. Walton is also supported by the European Union's Horizon 2020 research and  
379 innovation programme (grant n° 848158).

### 380 **Disclosure statement**

381 The authors report no conflict of interest.

382

### 383 **REFERENCES**

- 384 1 Petronis, A. Epigenetics as a unifying principle in the aetiology of complex traits and diseases.  
385 *Nature* **465**, 721-727, doi:10.1038/nature09230 (2010).
- 386 2 Boyce, W. T. & Kobor, M. S. Development and the epigenome: the 'synapse' of gene-  
387 environment interplay. *Dev Sci* **18**, 1-23, doi:10.1111/desc.12282 (2015).

- 388 3 Zhu, Y. *et al.* A Structured Approach to Evaluating Life Course Hypotheses: Moving Beyond  
389 Analyses of Exposed Versus Unexposed in the Omics Context. *Am. J. Epidemiol.*,  
390 doi:10.1093/aje/kwaa246 (2020).
- 391 4 Mishra, G. *et al.* A structured approach to modelling the effects of binary exposure variables  
392 over the life course. *Int. J. Epidemiol.*, doi:10.1093/ije/dyn229 (2009).
- 393 5 Dunn, E. C. *et al.* Sensitive Periods for the Effect of Childhood Adversity on DNA  
394 Methylation: Results From a Prospective, Longitudinal Study. *Biol. Psychiatry*,  
395 doi:10.1016/j.biopsych.2018.12.023 (2019).
- 396 6 Richmond, R. C., Suderman, M., Langdon, R., Relton, C. L. & Davey Smith, G. DNA  
397 methylation as a marker for prenatal smoke exposure in adults. *Int. J. Epidemiol.* **47**, 1120-  
398 1130, doi:10.1093/ije/dyy091 (2018).
- 399 7 Fraser, A. *et al.* Cohort Profile: the Avon Longitudinal Study of Parents and Children: ALSPAC  
400 mothers cohort. *Int. J. Epidemiol.* **42**, 97-110, doi:10.1093/ije/dys066 (2013).
- 401 8 Boyd, A. *et al.* Cohort Profile: the 'children of the 90s'--the index offspring of the Avon  
402 Longitudinal Study of Parents and Children. *Int. J. Epidemiol.* **42**, 111-127,  
403 doi:10.1093/ije/dys064 (2013).
- 404 9 Relton, C. L. *et al.* Data resource profile: Accessible resource for integrated epigenomic studies  
405 (ARIES). *Int. J. Epidemiol.*, doi:10.1093/ije/dyv072 (2015).
- 406 10 Touleimat, N. & Tost, J. Complete pipeline for Infinium® Human Methylation 450K BeadChip  
407 data processing using subset quantile normalization for accurate DNA methylation estimation.  
408 *Epigenomics* **4**, 325-341, doi:10.2217/epi.12.21 (2012).
- 409 11 Min, J. L., Hemani, G., Davey Smith, G., Relton, C. & Suderman, M. Meffil: efficient  
410 normalization and analysis of very large DNA methylation datasets. *Bioinformatics (Oxford,*  
411 *England)* **34**, 3983-3989, doi:10.1093/bioinformatics/bty476 (2018).
- 412 12 Smyth, G. K. in *Bioinformatics and Computational Biology Solutions Using R and*  
413 *Bioconductor* (eds Robert Gentleman *et al.*) 397-420 (2005).
- 414 13 Houseman, E. A., Molitor, J. & Marsit, C. J. Reference-free cell mixture adjustments in analysis  
415 of DNA methylation data. *Bioinformatics* **30**, doi:10.1093/bioinformatics/btu029 (2014).
- 416 14 Benjamini, Y. & Hochberg, Y. Controlling the False Discovery Rate: A Practical and Powerful  
417 Approach to Multiple Testing. *Journal of the Royal Statistical Society. Series B*  
418 *(Methodological)* **57**, 289 - 300, doi:10.2307/2346101 (1995).
- 419 15 Smith, A. D. A. C. *et al.* A structured approach to hypotheses involving continuous exposures  
420 over the life course. *Int. J. Epidemiol.*, doi:10.1093/ije/dyw164 (2016).

- 421 16 Smith, A. D. A. C. *et al.* Model Selection of the Effect of Binary Exposures over the Life  
422 Course. *Epidemiology*, doi:10.1097/EDE.0000000000000348 (2015).
- 423 17 Dunn, E. C. *et al.* What life course theoretical models best explain the relationship between  
424 exposure to childhood adversity and psychopathology symptoms: Recency, accumulation, or  
425 sensitive periods? *Psychol. Med.*, doi:10.1017/S0033291718000181 (2018).
- 426 18 Lockhart, R., Taylor, J., Tibshirani, R. J. & Tibshirani, R. A significance test for the lasso. *Ann.*  
427 *Statist.* **42**, 413-468, doi:10.1214/13-AOS1175 (2014).
- 428 19 Tibshirani, R. J., Taylor, J., Lockhart, R. & Tibshirani, R. Exact Post-Selection Inference for  
429 Sequential Regression Procedures. *Journal of the American Statistical Association* **111**, 600-  
430 620, doi:10.1080/01621459.2015.1108848 (2016).
- 431 20 Frisch, R. & Waugh, V. F. Partial Time Regressions as Compared with Individual Trends.  
432 *Econometrica*, doi:10.2307/1907330 (1933).
- 433 21 Yamada, H. The Frisch–Waugh–Lovell theorem for the lasso and the ridge regression.  
434 *Communications in Statistics - Theory and Methods* **46**, 10897-10902,  
435 doi:10.1080/03610926.2016.1252403 (2017).
- 436 22 Alfano, R. *et al.* Socioeconomic position during pregnancy and DNA methylation signatures at  
437 three stages across early life: epigenome-wide association studies in the ALSPAC birth cohort.  
438 *Int. J. Epidemiol.* **48**, 30-44, doi:10.1093/ije/dyy259 (2019).
- 439 23 Kramer, M. S., Séguin, L., Lydon, J. & Goulet, L. Socio-economic disparities in pregnancy  
440 outcome: why do the poor fare so poorly? *Paediatr. Perinat. Epidemiol.* **14**, 194-210,  
441 doi:<https://doi.org/10.1046/j.1365-3016.2000.00266.x> (2000).
- 442 24 Wu, Z. & Aryee, M. J. Subset quantile normalization using negative control features. *Journal of*  
443 *computational biology : a journal of computational molecular cell biology* **17**, 1385-1395,  
444 doi:10.1089/cmb.2010.0049 (2010).
- 445 25 Huak, C. Y. Are you a p-value worshipper? *Eur J Dent* **3**, 161-164 (2009).
- 446 26 Jones, D. & Matloff, N. Statistical hypothesis testing in biology: a contradiction in terms. *J.*  
447 *Econ. Entomol.* **79**, 1156-1160, doi:10.1093/jee/79.5.1156 (1986).
- 448 27 Sterne, J. A. & Davey Smith, G. Sifting the evidence-what's wrong with significance tests? *BMJ*  
449 *(Clinical research ed.)* **322**, 226-231, doi:10.1136/bmj.322.7280.226 (2001).
- 450 28 Wasserstein, R. L., Schirm, A. L. & Lazar, N. A. Moving to a World Beyond “ $p < 0.05$ ”. *The*  
451 *American Statistician* **73**, 1-19, doi:10.1080/00031305.2019.1583913 (2019).
- 452 29 Wasserstein, R. L. & Lazar, N. A. The ASA Statement on p-Values: Context, Process, and  
453 Purpose. *The American Statistician* **70**, 129-133, doi:10.1080/00031305.2016.1154108 (2016).



- 454 30 Staley, J. R. *et al.* A robust mean and variance test with application to high-dimensional  
455 phenotypes. *bioRxiv*, 2020.2002.2006.926584, doi:10.1101/2020.02.06.926584 (2020).
- 456 31 Kaur, G., Begum, R., Thota, S. & Batra, S. A systematic review of smoking-related epigenetic  
457 alterations. *Arch. Toxicol.* **93**, 2715-2740, doi:10.1007/s00204-019-02562-y (2019).
- 458 32 Silva, C. P. & Kamens, H. M. No Pagination Specified-No Pagination Specified (American  
459 Psychological Association, US, 2020).
- 460 33 Cecil, C. A. M., Zhang, Y. & Nolte, T. Childhood maltreatment and DNA methylation: A  
461 systematic review. *Neuroscience & Biobehavioral Reviews* **112**, 392-409,  
462 doi:<https://doi.org/10.1016/j.neubiorev.2020.02.019> (2020).
- 463 34 Smith, A. K. *et al.* DNA extracted from saliva for methylation studies of psychiatric traits:  
464 evidence tissue specificity and relatedness to brain. *Am. J. Med. Genet. B Neuropsychiatr.*  
465 *Genet.* **168b**, 36-44, doi:10.1002/ajmg.b.32278 (2015).
- 466 35 Dudek, K. A., Kaufmann, F. N., Lavoie, O. & Menard, C. Central and peripheral stress-induced  
467 epigenetic mechanisms of resilience. *Current Opinion in Psychiatry* **34** (2021).
- 468 36 Gatev, E., Gladish, N., Mostafavi, S. & Kobor, M. S. CoMeBack: DNA methylation array data  
469 analysis for co-methylated regions. *Bioinformatics* **36**, 2675-2683,  
470 doi:10.1093/bioinformatics/btaa049 (2020).
- 471 37 Peters, T. J. *et al.* De novo identification of differentially methylated regions in the human  
472 genome. *Epigenetics & Chromatin* **8**, 6, doi:10.1186/1756-8935-8-6 (2015).
- 473 38 Langfelder, P. & Horvath, S. WGCNA: an R package for weighted correlation network  
474 analysis. *BMC Bioinformatics* **9**, 559, doi:10.1186/1471-2105-9-559 (2008).
- 475



477 Table 1. Summary of analyses and significant CpGs

| Analysis details                  | Data version changes   |     |                       |     | Analytic version changes |                  |
|-----------------------------------|------------------------|-----|-----------------------|-----|--------------------------|------------------|
|                                   | EWAS                   |     | SLCMA                 |     | SLCMA                    |                  |
| Analytic approach                 | Ordinary least squares |     | Covariance test       |     | Selective inference      |                  |
| Inference method                  | Standard <sup>a</sup>  |     | Standard <sup>a</sup> |     | Standard <sup>a</sup>    | FWL <sup>b</sup> |
| Covariate adjustment              | Old                    | New | Old                   | New | New                      |                  |
| Data version                      |                        |     |                       |     |                          |                  |
| <b>Adversity hits<sup>c</sup></b> |                        |     |                       |     |                          |                  |
| Abuse (sexual or physical)        | 1                      | 0   | 66                    | 35  | 0                        | 2                |
| Financial stress                  | 0                      | 5   | 75                    | 294 | 0                        | 2                |
| Family instability                | 0                      | 0   | 25                    | 225 | 0                        | 43               |
| Maternal psychopathology          | 0                      | 0   | 31                    | 73  | 0                        | 0                |
| Neighborhood disadvantage         | 0                      | 0   | 129                   | 20  | 0                        | 0                |
| One adult household               | 0                      | 0   | 28                    | 7   | 0                        | 0                |
| Parental cruelty                  | 0                      | 0   | 18                    | 10  | 1                        | 1                |

<sup>a</sup> Covariate adjustment was performed using standard methods.

<sup>b</sup> Frisch-Waugh-Lovell (FWL) theorem applied for covariate adjustment and socioeconomic position replaced with maternal education.

<sup>c</sup> Number of associated CpGs at a false-discovery rate <0.05.

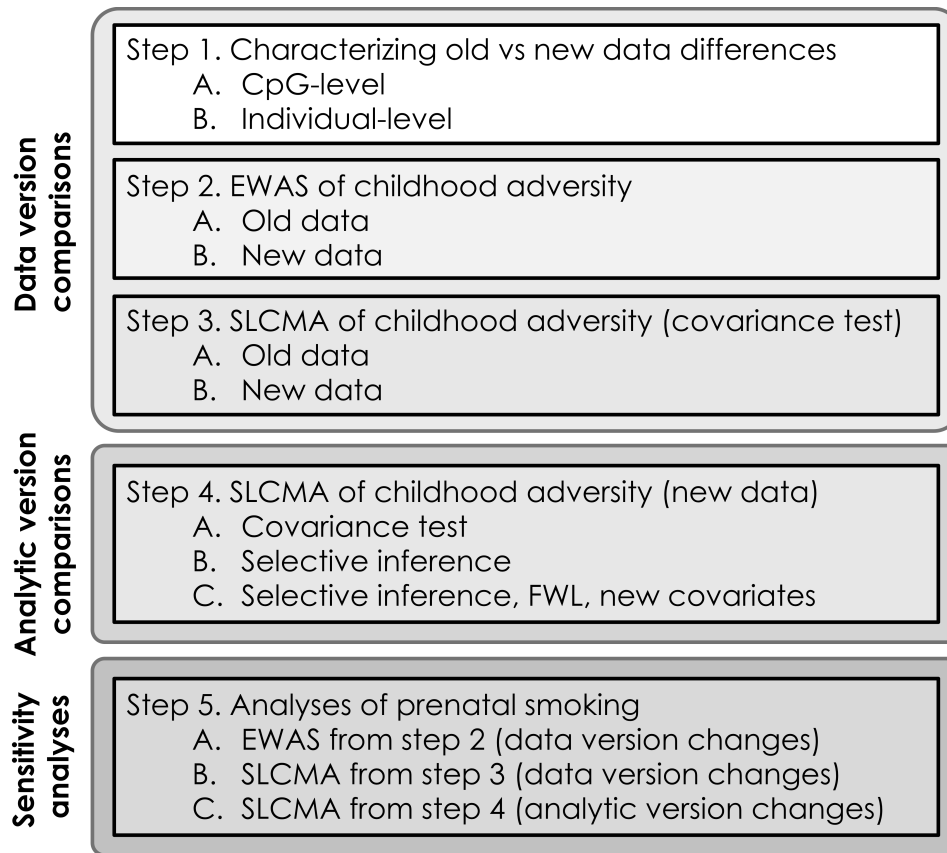

**Figure 1. Overview of analyses.** Steps 1-3 outline the impact of data version differences. Step 4 outlines the effect of analytic version differences. Here, childhood adversity refers to the seven different types of adversity that were assessed in these analyses. Step 5 outlines the sensitivity analyses of exposure to maternal smoking during gestation, which performed like steps 2-4. \*FWL = Frisch-Waugh-Lovell theorem (covariate adjustment methods).

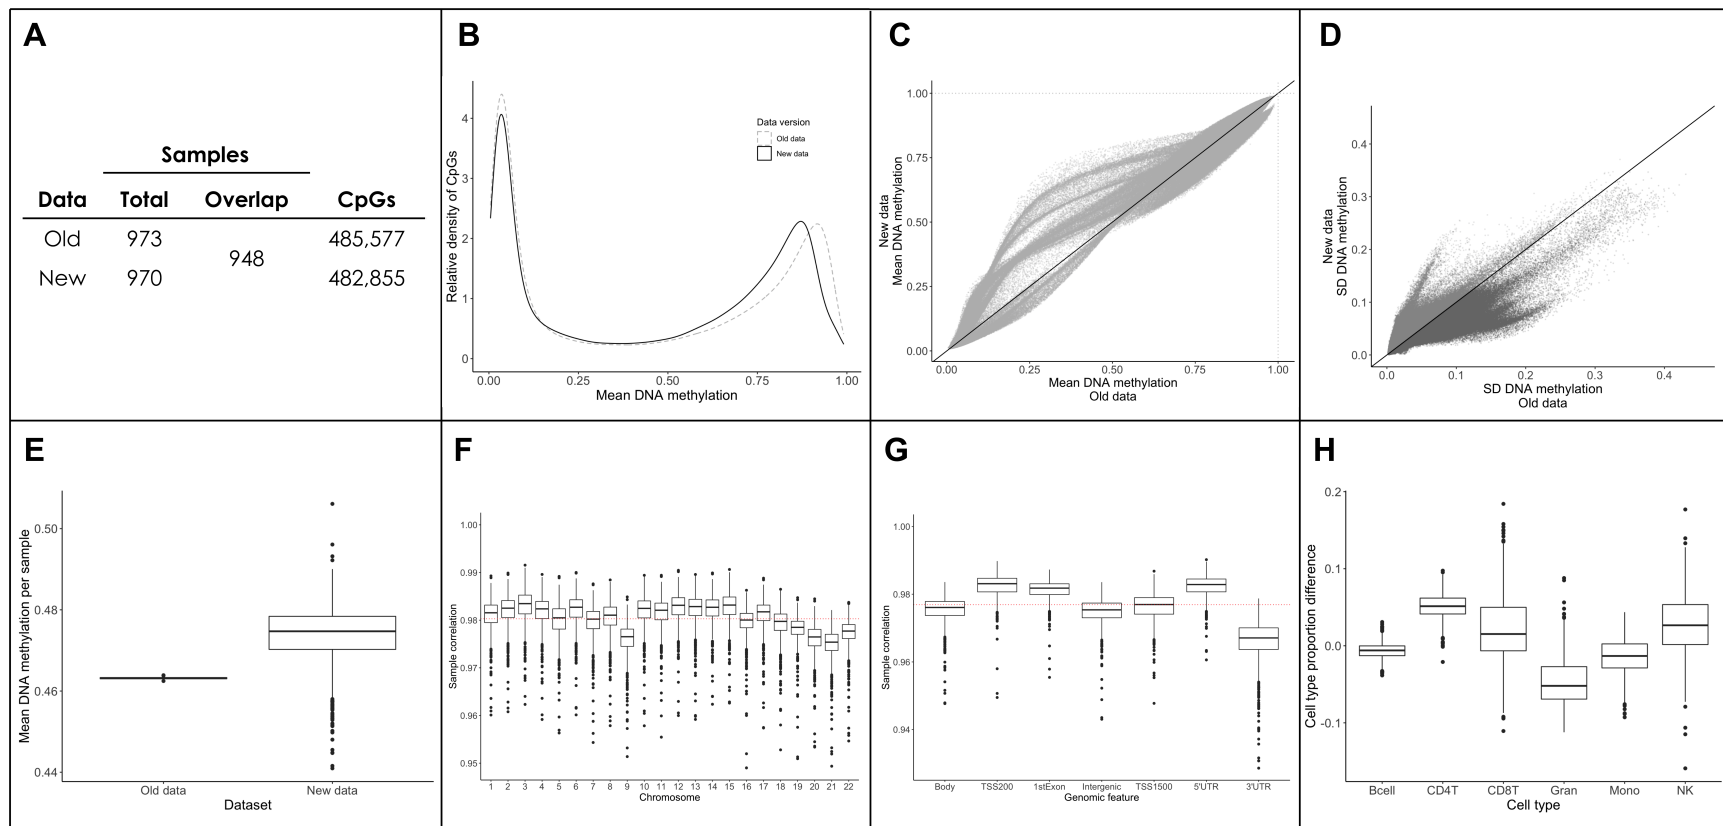

**Figure 2. Differences between data versions of the ARIES cohort.**

**A)** 948 participants overlapped between versions of the data. The new dataset had slightly less probes due to filtering procedures.

**B)** Both the old and the new data showed typical bimodal distributions. However, the density of genome-wide DNA methylation was shifted towards the left in the new data, suggesting that the setpoint of hypermethylated CpGs was lower in the new data.

**C)** Mean values for each CpG were shifted towards more middling values in the new data.

**D)** The standard deviation (SD) of each CpG was generally higher in the old data. 300,839 CpGs had higher variability in the old data (dark grey) and 182,016 CpGs had higher variability in the new data (light grey).

**E)** Individual-level mean DNA methylation (across all CpGs) varied substantially between data versions. The new data were highly variable, whereas the old data showed no variability between participants.

- F)** Individual-level DNAm data were generally highly correlated between data versions ( $r=0.98$ , red line), with no clear biases detected for specific chromosomes.
- G)** Individual-level DNAm from specific genomic regions were generally highly correlated between data versions ( $r=0.98$ , red line). However, CpGs located in 3'UTRs showed slightly lower correlations between datasets.
- H)** Estimated cell type proportions showed slight differences between the old and new datasets (differences were calculated by subtracting old data proportions from new data proportions).

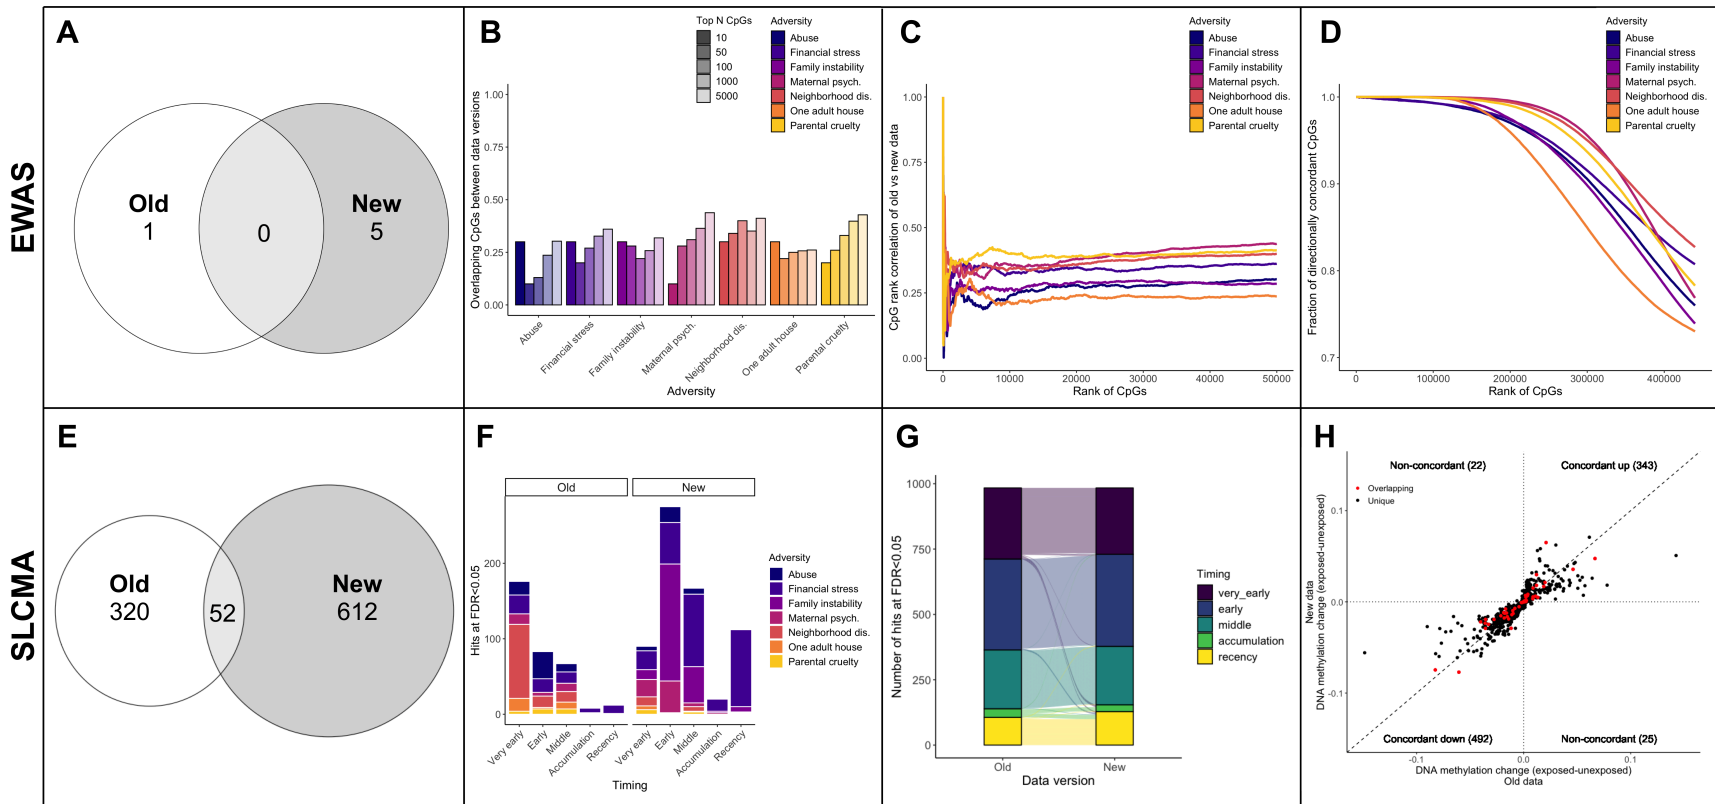

**Figure 3. Updates to data versions change the results of epigenetic analyses, for both EWAS and SLCMA.**

**A)** Overlap of the hits at  $FDR < 0.05$  between the old and new data for all seven different EWAS of childhood adversity.

**B)** Few CpGs overlapped between the old and new data versions at different p-value rank thresholds (top 10, 50, 100, 1000, 5000, and 50000 CpGs ranked by p-value).

**C)** The Spearman's rank correlation between CpGs (in old versus new data) that overlapped at a given rank (i.e., top N CpGs ordered by p-value) was relatively low across both data versions.

**D)** The direction of DNAm differences between exposed/unexposed groups was generally consistent across overlapping CpGs at a given rank (i.e., top CpGs ranked by p-value).

**E)** Overlap of the hits at  $FDR < 0.05$  between the old and new data for all seven different SLCMA of childhood adversity.

**F)** Both the hypotheses selected most frequently, and the adversities identified as having the most hits varied between data versions with the SLCMA for CpGs significant at  $FDR < 0.05$ .

**G)** The selected hypothesis from all top hits (shown in E) were generally consistent across data versions. Each line depicted corresponds to a specific CpG and shows whether its selected hypothesis differs between analyses.

**H)** The difference in DNAm values between exposed and unexposed participants across all top SLCMA hits from E was generally consistent between data versions, regardless of statistical significance. Only shown here are the CpGs associated with sensitive period hypotheses, as the difference between exposed and unexposed individuals is not calculated for the accumulation and recency hypotheses.

\*Maternal psych = maternal psychopathology; Neighborhood dis = neighborhood disadvantage.

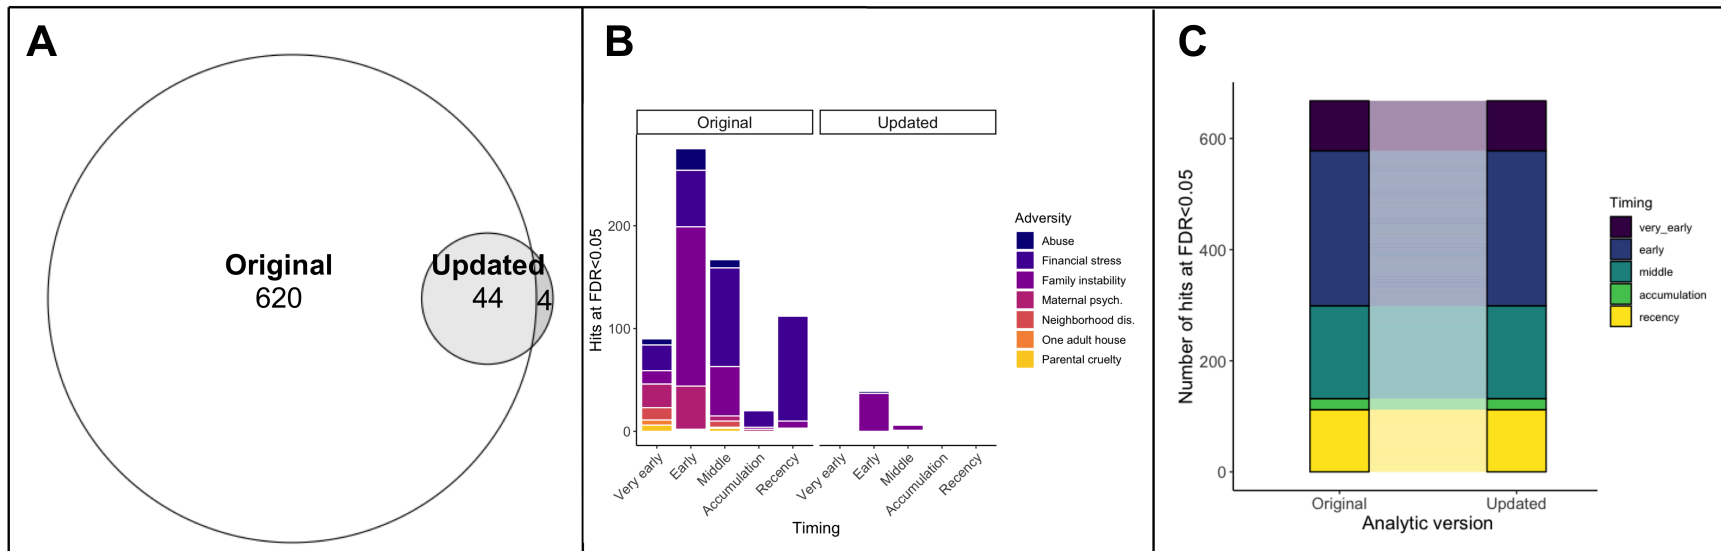

**Figure 4. Updates to analytic versions change the results of SLCMA.**

**A)** Overlap of the hits at FDR<0.05 for all seven different SLCMA of adversity between the standard and updated analytic versions (analyses performed with the new data).

**B)** The pattern of hypotheses selected were similar across both analytic versions, though not all adversities had statistically significant associations in the updated analytic version.

**C)** The hypothesis selected across all significant CpGs from A was consistent across analytic versions.

\*Maternal psych = maternal psychopathology; Neighborhood dis = neighborhood disadvantage.
